# Supplementary material
Source: Royal Society of Chemistry journal article supplement (doi:10.1039/d6nj00196c)
Supplement: d6nj00196c1.pdf [file d6nj00196c1.pdf]

# 1 **Injectable self-healing hydrogels based on cation- $\pi$** 2 **interactions under physiological pH conditions**

3  
4 *Zhiwen Huang<sup>a#</sup>, Jing Xiaorong<sup>b#</sup>, Chuangyuan He<sup>c</sup>, Xi Lu<sup>a\*</sup>, Bin Yan<sup>c\*</sup>*

5  
6 <sup>a</sup> Oil Production Engineering Division, Sinopec Petroleum Exploration and Production Research  
7 Institute, Beijing, China 100083

8 <sup>b</sup> Department of Respiratory Therapy, West China Hospital, Sichuan University, Chengdu, China,  
9 610065

10 <sup>c</sup> National Engineering Laboratory for Clean Technology of Leather Manufacture, College of  
11 Biomass Science and Engineering, Sichuan University, Chengdu, China, 610065

12 <sup>#</sup> These authors Contributed equally to this work.

13 <sup>\*</sup> Address correspondence to [luxi.syky@sinopec.com](mailto:luxi.syky@sinopec.com) (X. Lu), yanbinscu@126.com (B. Yan)

## 14 15 **Testing and characterization**

16 The chemical structure of the monomers and polymers was characterized using a nuclear  
17 magnetic resonance (NMR) spectrometer (AV III HD 400 MHz, Bruker). The <sup>1</sup>H NMR of the  
18 samples was observed using deuterium-labeled chloroform (CDCl<sub>3</sub>) and heavy water (D<sub>2</sub>O) as  
19 solvents. The hydrodynamic diameter of the copolymer was measured using a Malvern Zetasizer  
20 Nano instrument. The polymer concentration was 0.1 wt%, and the experiment was conducted at  
21 temperatures ranging from 4 to 45 °C with an accuracy of  $\pm 0.1$  °C. The sample solution was  
22 equilibrated at a constant temperature for at least 3 minutes before data collection. The temperature  
23 at which the particle size suddenly increased was determined as the lower critical solution  
24 temperature (LCST). The molecular weight was determined using gel permeation chromatography  
25 (GPC) with tetrahydrofuran (THF) as the eluent, a flow rate of 0.8 mL/min, and a temperature of  
26 50°C. The rheological properties of different polymer hydrogels were tested using a rheometer  
27 (Anton Paar, MCR 302) with a 20 mm parallel plate configuration. Temperature ramp experiment:  
28 The LCST of different hydrogels was tested within the temperature range of 4-45°C at a heating  
29 rate of 1°C/min. Temperature dynamic strain scan experiment: The gel-sol stability transition of  
30 different polymer hydrogels was measured at temperatures above or below the LCST under constant  
31 angular frequency ( $\omega = 10$  rad/s) and strain ( $\gamma = 5\%$ ). Strain amplitude scan ( $\gamma = 0.1-1000\%$ ,  $\omega =$   
32  $10$  rad/s) experiment: The critical strain of different polymer hydrogels was determined by  
33 immediately applying a small strain ( $\gamma = 5\%$ ) after applying a large strain ( $\gamma = 1000\%$ ), observing  
34 the self-recovery of their modulus. Dynamic strain cycle step scan experiment: A step scan was  
35 performed between 1% and 300% strain at a constant angular frequency ( $\omega = 10$  rad/s). First, 1%  
36 strain was applied for 300 s, followed by 300% strain for 50 s, repeated 4 times, to observe the  
37 dynamic modulus recovery of different hydrogels.

## 38 39 **Self-healing and injectable properties of hydrogels**

40 Simply divide the hydrogel into two parts and then join them together, observing how the state  
41 of the joined hydrogel changes over time. Rheological experiments were conducted to test strain  
42 amplitude scanning ( $\gamma = 0.1-1000\%$ ,  $\omega = 10$  rad/s) and dynamic strain cycling step scanning

43 experiments. A 23G × 3/4" syringe was used to simulate the injectability of the hydrogel. The  
44 viscosity of the hydrogel was measured using a rheometer as a function of shear rate.

45

#### 46 **Anti-bacterial adhesion properties**

47 The hydrogel coating was prepared in a 24-well plate with cell-coated wells. In each well, the  
48 hydrogel group and the blank group were immersed in 2 mL of Escherichia coli or Staphylococcus  
49 aureus suspension ( $10^9$  CFU mL<sup>-1</sup>) for 3 hours of co-culture at 37 °C. The crawling sheets were  
50 rinsed three times with PBS solution, then the cell-adhered crawling sheets were heat-fixed and air-  
51 dried with a flame. Crystal violet was added and maintained for approximately 30 to 1 min, followed  
52 by rinsing with water. The sheets were immersed in Kresyl violet for 1 minute and rinsed with water.  
53 Then, they were washed with 95% ethanol or acetone for approximately 10–20 s and rinsed with  
54 water. Add vanillin for approximately 1 min and rinse with water. Air-dry, and observe cell adhesion  
55 under a microscope.

56

#### 57 **Cytotoxicity analysis**

58 The cytotoxicity of the hydrogel was assessed using the Cell Counting Kit-8 (CCK-8, Dojindo,  
59 Shanghai, China) at 1 day and 7 days. Mouse fibroblasts (L929) were seeded into a 96-well plate at  
60 a density of 5,000 cells per well for 1 day and 1,000 cell per well for 7 days. Cell viability was  
61 evaluated at 1 day and 7 days. After 24 h of incubation, fresh Dulbecco's modified Eagle's medium  
62 (DMEM) cell culture containing the polymer was transferred to each well, with final polymer  
63 concentrations of 1, 1.5, 2, and 2.5 mg/mL. Untreated cells served as controls. Proliferation was  
64 measured using CCK-8 after 1, 3, 5, and 7 days of incubation. Carefully remove the medium from  
65 each well and incubate with fresh medium at a final concentration of 10% and CCK-8 solution at  
66 37°C for 1–2 h. Read the plate using optical absorption spectroscopy at 450 nm and calculate cell  
67 viability relative to the control. Perform 6 replicates of the CCK-8 assay for each polymer  
68 concentration (n = 6).

69

70

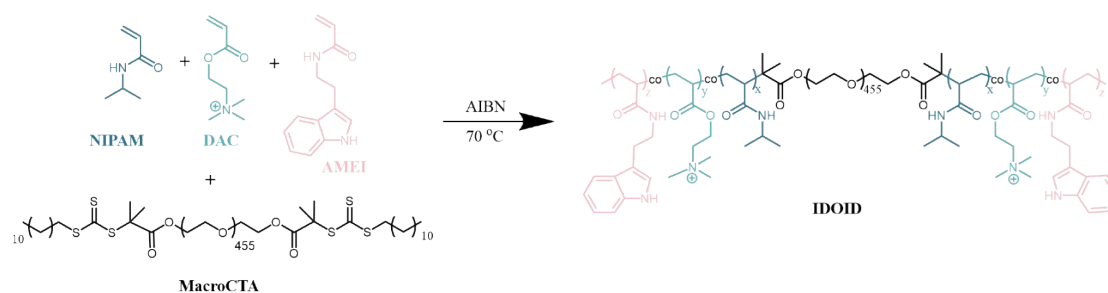

72 **Figure S1.** Synthesis scheme of the tri-block copolymer IDOID.

73

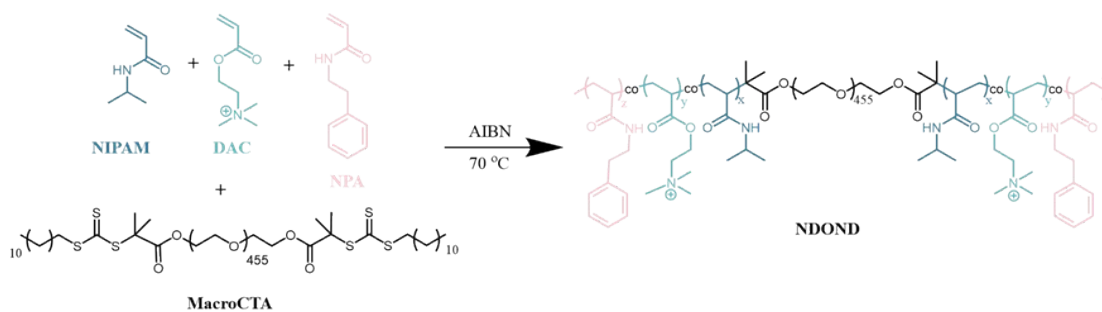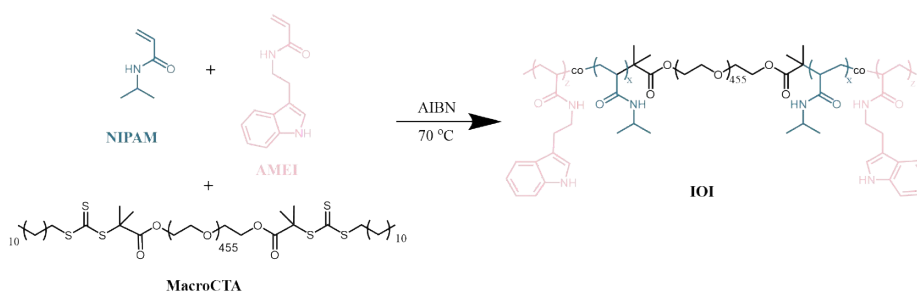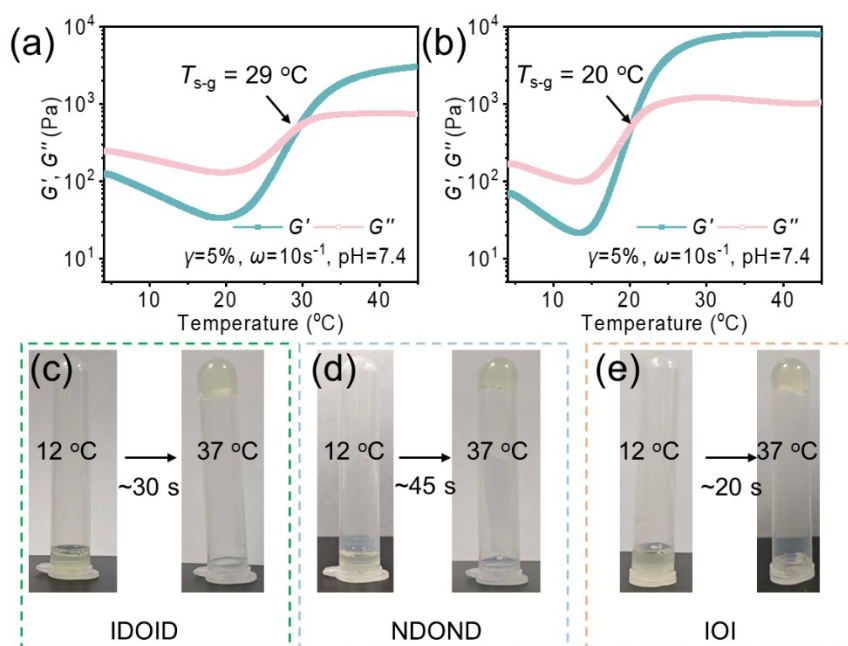

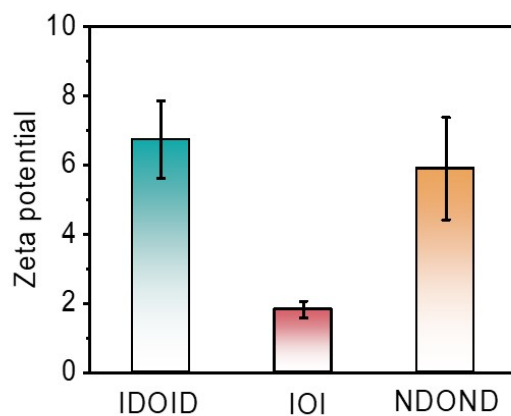

87

88 **Figure S5.** Zeta potentials of various polymers during micelle formation at 37°C.

89

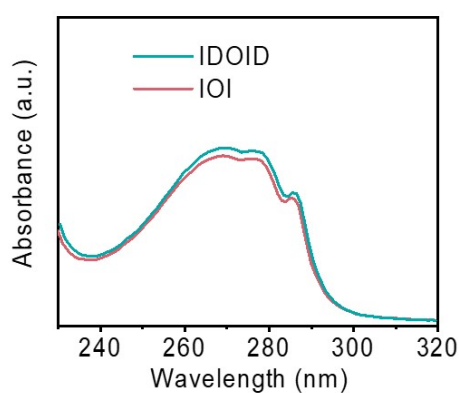

90

91 **Figure S6.** UV absorption spectra of IOI and IDOID in the range of 230-320 nm.

92

93

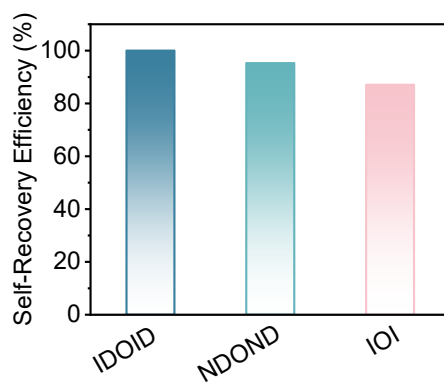

94

95 **Figure S7.** Recovery efficiency of different hydrogels.

96

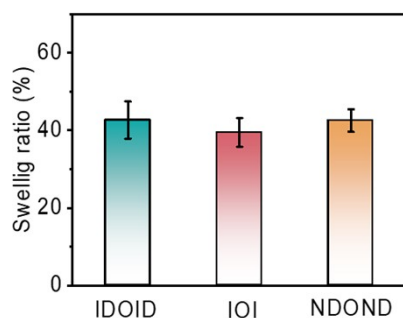

97

98 **Figure S8.** Swelling ratios of the hydrogels.

99

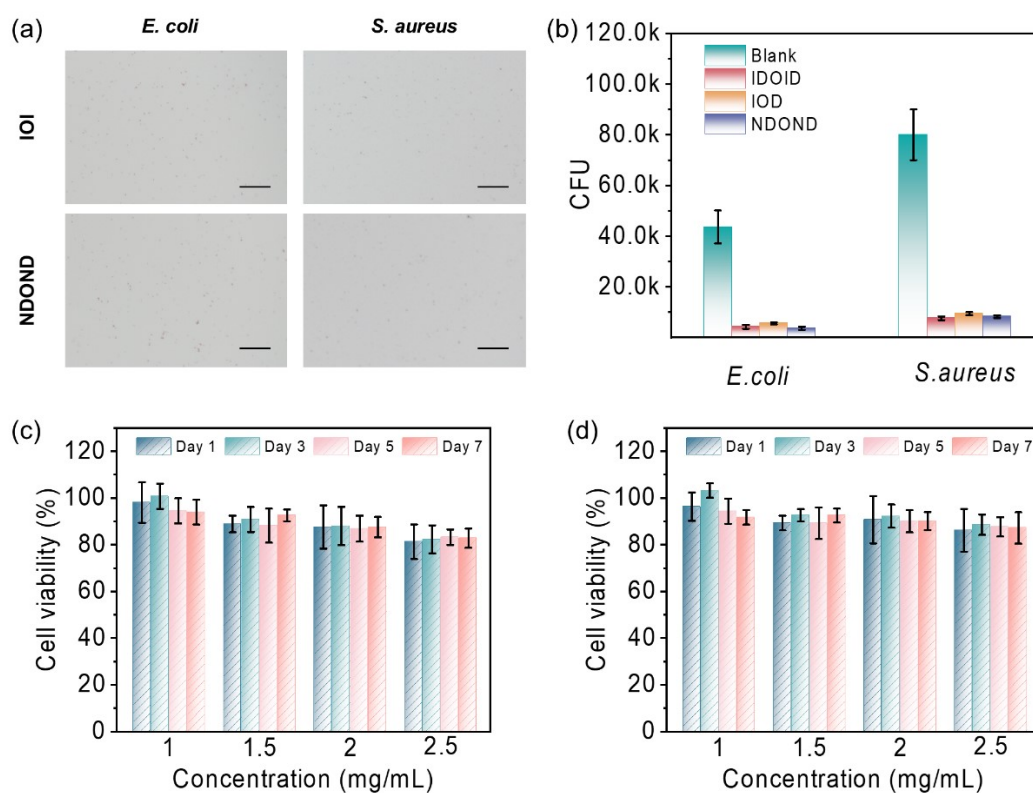

100

101 **Figure S9.** (a) Adhesion of glass plates containing IOI/NDOND hydrogels coating to *E. coli* and *S.*  
 102 *aureus*, stained with Gram's reagent. Quantitative assessment of *E. coli* and *S. aureus* adhesion on  
 103 various glass slides. (c-d) Cell viability of L 929 cells after 1, 3, 5 and 7 days of culture with  
 104 IOI/NDOND.

105

106

**Table S1.** Molecular characterizations of the synthesized triblock copolymers

| Polymer  | Mn (kDa) | Mw (kDa) | $\bar{D}$ |
|----------|----------|----------|-----------|
| MacroCTA | 26.1     | 29.3     | 1.12      |
| IDOID    | 72.3     | 89.6     | 1.24      |
| NDOND    | 71.6     | 88.7     | 1.24      |
| IOI      | 70.2     | 82.8     | 1.18      |

107
